# Supplementary material
Source: PubMed Central journal article supplement (PMC7540611)
Supplement: NIHMS1634573-supplement-Supplemental_Table.pdf [file NIHMS1634573-supplement-Supplemental_Table.pdf]

**Supplemental Table 1: Primer sequences for PCR and Real-Time RT-PCR assays:**

---

**RCAS** Sense: 5'-ACCGGGGGATGCGTAGGCTTCA-3'  
Antisense: 5'-CCGCAACACCCACTGGCATTACC-3'

**mDNMT1** Sense: 5'-TGACAGTGGTGCTGAAGAAGCCAT-3'  
Antisense: 5'-AGAATGGAGCCTCGAATTCTGAGA-3'

---
